# Supplementary material for: The first polyanion-substitution-driven centrosymmetric-to-noncentrosymmetric structural transformation realizing an excellent nonlinear optical supramolecule [Cd4P2][CdBr4]
Source: Royal Society of Chemistry journal article supplement (doi:10.1039/d3sc04818g), 2023-01-01
Supplement: d3sc04818g1.pdf [file d3sc04818g1.pdf]

## *Supporting Information*

# **The first polyanion substitution-driven centrosymmetric-to-noncentrosymmetric structural transformation realizing excellent nonlinear optical supramolecule [Cd<sub>4</sub>P<sub>2</sub>][CdBr<sub>4</sub>]**

*Zhi-Xin Qiu<sup>a</sup>, Zhe-Xiong Zheng<sup>a</sup>, Xiao-Ming Jiang<sup>a,b</sup>, Bin-Wen Liu<sup>a,b\*</sup> & Guo-Cong Guo<sup>a,b\*</sup>*

*<sup>a</sup> State Key Laboratory of Structural Chemistry, Fujian Institute of Research on the Structure of Matter, Chinese Academy of Sciences, Fuzhou, Fujian, 350002, P. R. China*

*<sup>b</sup> Fujian Science & Technology Innovation Laboratory for Optoelectronic Information of China, Fuzhou, Fujian 350108, P. R. China*

*E-mails: [bwliu@fjirsm.ac.cn](mailto:bwliu@fjirsm.ac.cn) (B.-W. Liu), [gcguo@fjirsm.ac.cn](mailto:gcguo@fjirsm.ac.cn) (G.-C. Guo)*

# Contents

## Figures and Tables

|                                                                                                              |   |
|--------------------------------------------------------------------------------------------------------------|---|
| <b>Fig. S1</b> EDS of <b>1</b> (a) and <b>2</b> (b).....                                                     | 3 |
| <b>Fig. S2</b> The powder XRD patterns of <b>1</b> (a) and <b>2</b> (b). .....                               | 3 |
| <b>Fig. S3.</b> Band gap of <b>1</b> . .....                                                                 | 3 |
| <b>Fig. S4</b> The SHG responses of <b>2</b> at broadband wavelength 1064 to 1700 nm. ....                   | 4 |
| <b>Fig. S5</b> Effective NLO coefficient for <b>2</b> . .....                                                | 4 |
| <b>Table S1.</b> Crystallographic data and structure refinement parameters for <b>1</b> and <b>2</b> . ..... | 5 |
| <b>Table S2.</b> Fractional atomic coordinates for <b>1</b> and <b>2</b> .....                               | 5 |
| <b>Table S3.</b> Bond Lengths for <b>1</b> and <b>2</b> .....                                                | 6 |
| <b>Table S4.</b> Calculation of dipole moment for tetrahedrons and net dipole moment for a unit cell.....    | 6 |
| <b>Table S5.</b> The LIDTs of compound <b>2</b> and AGS.....                                                 | 7 |

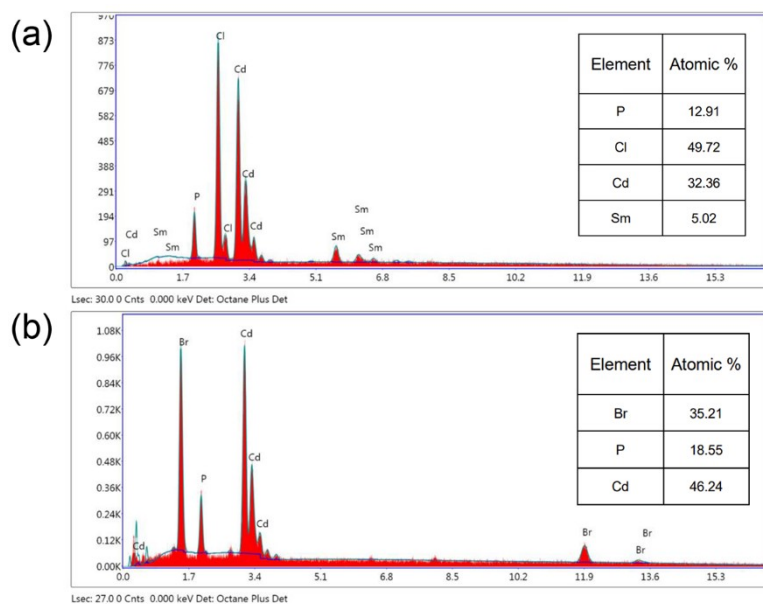

**Fig. S1** EDS of **1** (a) and **2** (b).

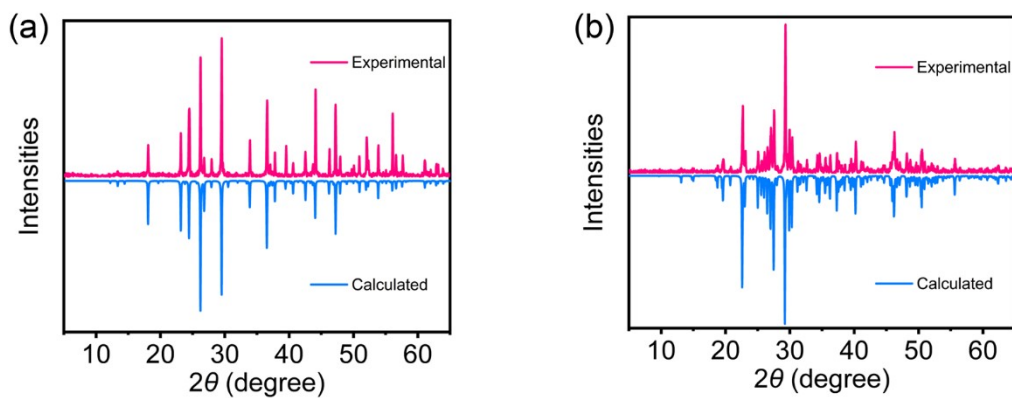

**Fig. S2** The powder XRD patterns of **1** (a) and **2** (b).

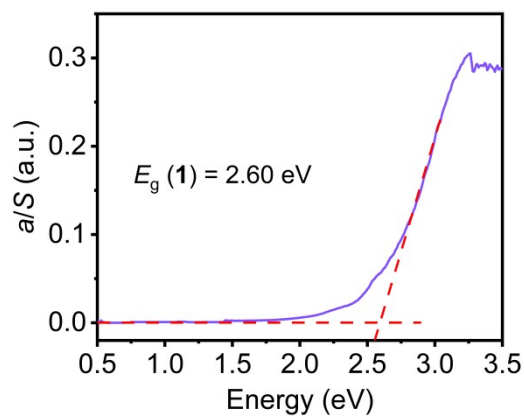

**Fig. S3** Band gap of **1**.

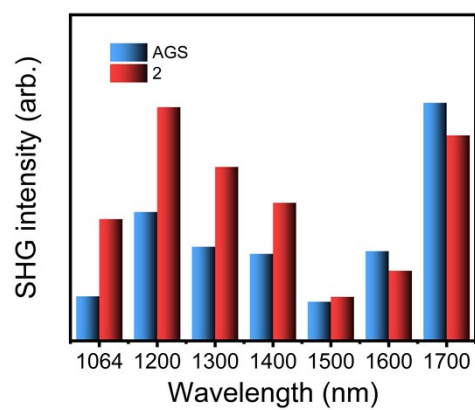

**Fig. S4** The SHG responses of **2** at broadband wavelength 1064 to 1700 nm.

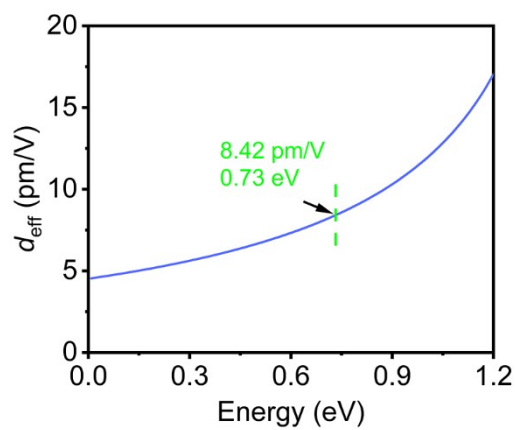

**Fig. S5** Effective NLO coefficient for **2**.

**Table S1.** Crystallographic data and structure refinement parameters for **1** and **2**.

| Empirical formula                                                       | [Cd <sub>5</sub> P <sub>2</sub> ][SmCl <sub>6</sub> ]Cl ( <b>1</b> ) | [Cd <sub>4</sub> P <sub>2</sub> ][CdBr <sub>4</sub> ] ( <b>2</b> ) |
|-------------------------------------------------------------------------|----------------------------------------------------------------------|--------------------------------------------------------------------|
| CCDC                                                                    | 2235035                                                              | 2235036                                                            |
| <i>F</i> w                                                              | 1022.50                                                              | 943.58                                                             |
| Temperature (K)                                                         | 293(2)                                                               | 293(2)                                                             |
| Space group                                                             | <i>P</i> -3                                                          | <i>Pna</i> 2 <sub>1</sub>                                          |
| <i>a</i> (Å)                                                            | 13.350(4)                                                            | 12.1965(8)                                                         |
| <i>b</i> (Å)                                                            | 13.350(4)                                                            | 13.6691(10)                                                        |
| <i>c</i> (Å)                                                            | 7.308(4)                                                             | 7.7077(7)                                                          |
| <i>V</i> (Å <sup>3</sup> )                                              | 1128.0(9)                                                            | 1284.99(17)                                                        |
| <i>Z</i>                                                                | 3                                                                    | 4                                                                  |
| <i>D</i> <sub>calcd</sub> (g·cm <sup>-3</sup> )                         | 4.516                                                                | 4.877                                                              |
| <i>μ</i> (mm <sup>-1</sup> )                                            | 12.199                                                               | 20.769                                                             |
| <i>GOF</i> on <i>F</i> <sup>2</sup>                                     | 1.005                                                                | 0.999                                                              |
| <i>R</i> <sub>1</sub> <sup><i>a</i></sup> ( <i>I</i> > 2σ( <i>I</i> ))  | 0.0611                                                               | 0.0451                                                             |
| <i>wR</i> <sub>2</sub> <sup><i>b</i></sup> ( <i>I</i> > 2σ( <i>I</i> )) | 0.1643                                                               | 0.1320                                                             |
| <i>R</i> <sub>1</sub> <sup><i>a</i></sup> (all data)                    | 0.0786                                                               | 0.0479                                                             |
| <i>wR</i> <sub>2</sub> <sup><i>b</i></sup> (all data)                   | 0.1810                                                               | 0.1338                                                             |
| Δρ <sub>max</sub> /Δρ <sub>min</sub> (e Å <sup>-3</sup> )               | 2.38/-2.27                                                           | 2.21/-1.47                                                         |

$${}^a R = \Sigma ||F_o| - |F_c|| / \Sigma |F_o|, {}^b wR = (\Sigma (w(F_o^2 - F_c^2)^2) / \Sigma (w(F_o^2)^2))^{1/2}.$$

**Table S2.** Fractional atomic coordinates (×10<sup>4</sup>) and equivalent isotropic displacement parameters (Å<sup>2</sup>×10<sup>3</sup>) for **1** and **2**. *U*<sub>eq</sub> is defined as 1/3 of the trace of the orthogonalized *U*<sub>*ij*</sub> tensor.

| <b>1</b> |            |            |           |                        |
|----------|------------|------------|-----------|------------------------|
| Atom     | <i>x</i>   | <i>y</i>   | <i>z</i>  | <i>U</i> <sub>eq</sub> |
| Sm1      | 3333       | 6667       | 647(3)    | 24.4(5)                |
| Sm1B     | 3333       | 6667       | 9648(18)  | 25(3)                  |
| Sm2      | 0          | 0          | 610(3)    | 27.7(7)                |
| Cl3      | 4998(3)    | 3294(3)    | 1713(5)   | 32.8(9)                |
| Cl4      | 3378(4)    | 4785(4)    | 1751(6)   | 48.8(11)               |
| Cl5      | 1801(4)    | 1709(4)    | 1742(6)   | 47.7(11)               |
| Cl6      | 3333       | 6667       | 4412(15)  | 97(4)                  |
| Cl7      | 0          | 0          | 4410(20)  | 101(8)                 |
| Cd8      | 160.6(12)  | 3400.0(12) | 377.9(16) | 53.1(5)                |
| Cd9      | 5000       | 0          | 5000      | 77.6(9)                |
| Cd10     | 3336.0(18) | 1645.3(13) | 4902(2)   | 75.0(7)                |
| P11      | 60(3)      | 3363(3)    | 3699(5)   | 21.3(8)                |
| <b>2</b> |            |            |           |                        |
| Atom     | <i>x</i>   | <i>y</i>   | <i>z</i>  | <i>U</i> <sub>eq</sub> |
| Cd1      | 7768.6(17) | 7500.1(13) | 9879(3)   | 36.3(5)                |
| Cd2      | 7480.7(13) | 9134.4(19) | 5069(4)   | 48.9(6)                |
| Cd3      | 5095(2)    | 5464.1(17) | 8023(3)   | 48.2(6)                |
| Cd4      | 9501.3(17) | 5023.7(17) | 6538(3)   | 45.5(6)                |

|     |            |            |          |          |
|-----|------------|------------|----------|----------|
| Cd5 | 9927(2)    | 2413.5(16) | 8939(4)  | 45.8(7)  |
| Br6 | 9983.2(18) | 7725(2)    | 10001(4) | 40.1(6)  |
| Br7 | 7282(2)    | 9280.0(18) | 9179(4)  | 36.6(6)  |
| Br8 | 7491.2(17) | 6277(2)    | 7411(4)  | 37.2(6)  |
| Br9 | 7492.7(19) | 6862(2)    | 2943(4)  | 40.9(7)  |
| P10 | 9458(4)    | 9158(4)    | 5089(8)  | 24.0(11) |
| P11 | 9433(5)    | 4133(4)    | 9370(8)  | 25.8(12) |

**Table S3.** Bond Lengths for **1** and **2**.

| <b>1</b>    |                 |             |                 |
|-------------|-----------------|-------------|-----------------|
| <b>Bond</b> | <b>Length/Å</b> | <b>Bond</b> | <b>Length/Å</b> |
| Sm1–Cl3×3   | 2.798(4)        | Sm2–Cl7     | 2.775(1)        |
| Sm1–Cl4×3   | 2.668(4)        | P11–Cd8     | 2.430(4)        |
| Sm1B–Cl3×3  | 2.417(6)        | P11–Cd9     | 2.430(4)        |
| Sm1B–Cl4×3  | 2.971(8)        | P11–Cd9     | 2.422(3)        |
| Sm2–Cl5×3   | 2.908(5)        | P11–Cd10    | 2.420(3)        |
| Sm2–Cl5×3   | 2.487(5)        | P11–Cd10    | 2.421(3)        |
| <b>2</b>    |                 |             |                 |
| <b>Bond</b> | <b>Length/Å</b> | <b>Bond</b> | <b>Length/Å</b> |
| Cd1–Br6     | 2.720(3)        | Cd5–Br6     | 3.043(4)        |
| Cd1–Br7     | 2.562(3)        | P10–Cd3     | 2.454(6)        |
| Cd1–Br8     | 2.555(3)        | P10–Cd3     | 2.446(7)        |
| Cd1–Br9     | 2.540(4)        | P10–Cd5     | 2.441(6)        |
| Cd3–Br6     | 2.910(4)        | P11–Cd2     | 2.407(6)        |
| Cd4–Br7     | 3.012(4)        | P11–Cd4     | 2.444(6)        |
| Cd4–Br8     | 3.066(3)        |             |                 |

**Table S4.** Calculation of dipole moment for tetrahedrons and net dipole moment for a unit cell.

| Polar unit                         | Dipole moment (Debye) |                     |                     |
|------------------------------------|-----------------------|---------------------|---------------------|
|                                    | <i>x</i> -component   | <i>y</i> -component | <i>z</i> -component |
| CdBr <sub>4</sub>                  | ±14.46                | ±1.78               | (−0.47) × 4         |
| P10Cd <sub>4</sub>                 | ±9.9                  | ±0.10               | (2.20) × 4          |
| P11Cd <sub>4</sub>                 | ±8.99                 | ±2.73               | (4.93) × 4          |
| Net dipole moment<br>(a unit cell) | 0                     | 0                   | 26.64               |

**Table S5.** The LIDTs of compound **2** and AGS.

| Compounds | Damage energy (mJ) | Spot area (cm <sup>2</sup> ) | $\tau_p$ (ns) | Damage threshold<br>[MW·cm <sup>−2</sup> ] |
|-----------|--------------------|------------------------------|---------------|--------------------------------------------|
| <b>2</b>  | 4.0                | 0.05                         | 10            | 33.3                                       |
| AGS       | 1.2                | 0.05                         | 10            | 10.0                                       |
